# Supplementary material for: The Barcelona Predictive Model of Clinically Significant Prostate Cancer
Source: MDPI journal article supplement (doi:10.3390/cancers14061589), 2022-03-21
Supplement: s1 [file s1]

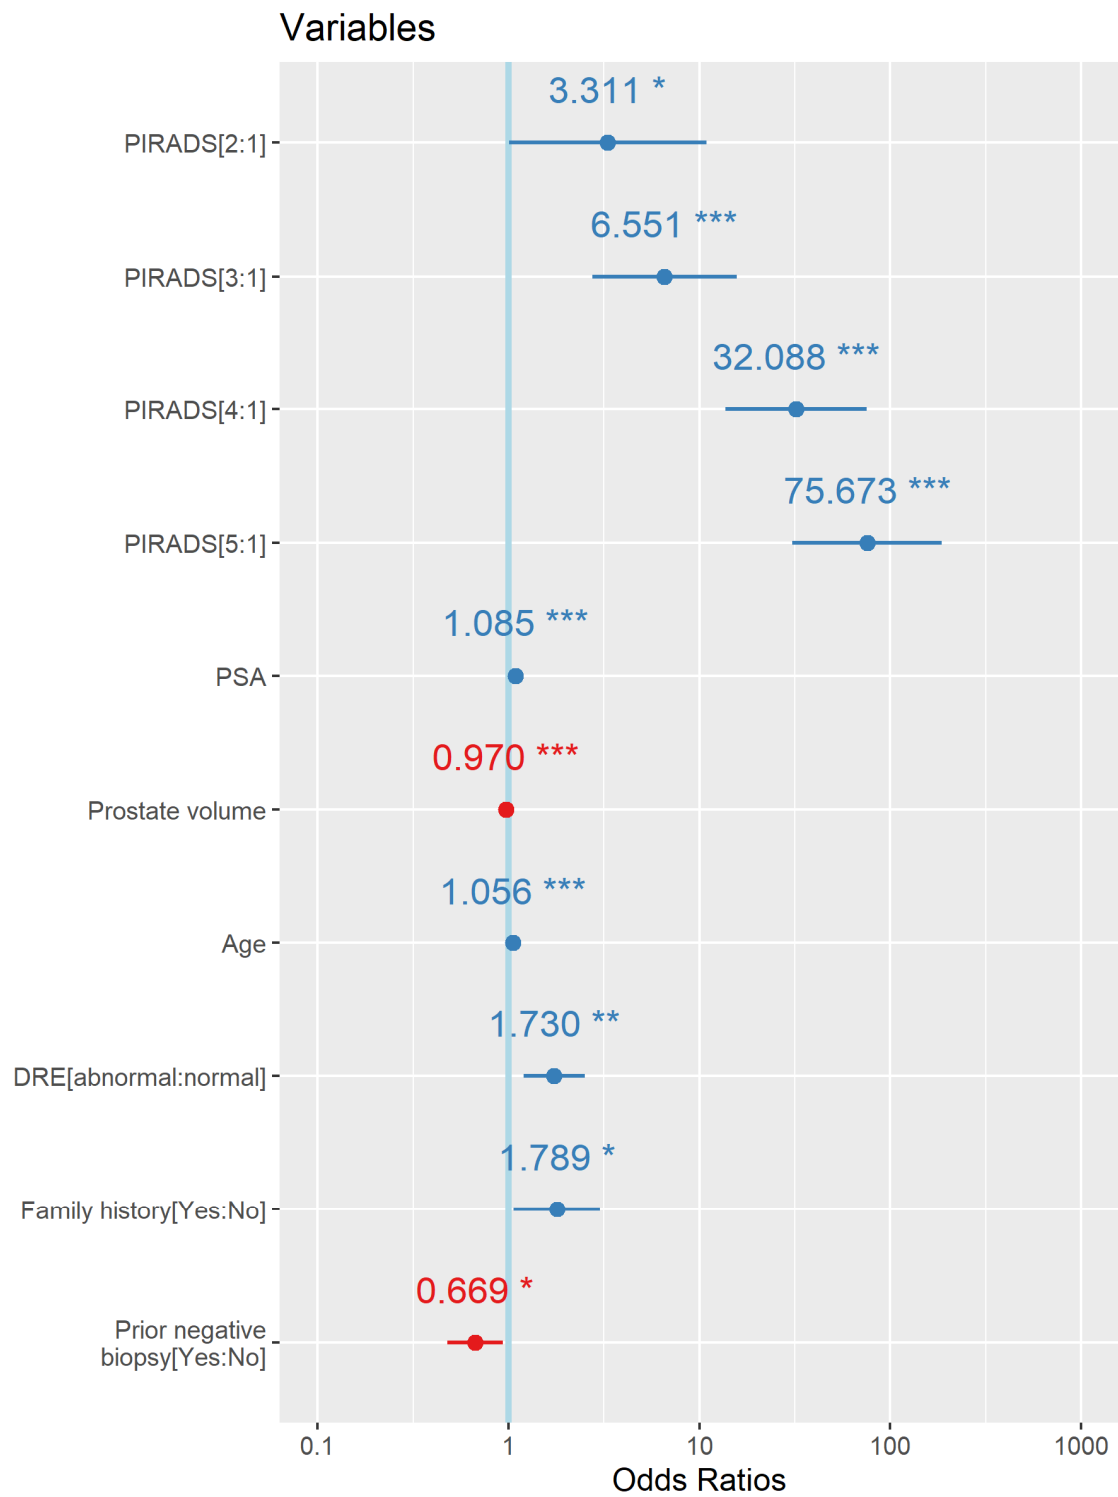

**Figure S1.** Forest plot of the odds ratios of independent predictors of csPCa included in the development cohort. PI-RADS = Prostate Imaging-Reporting and Data System; PSA = prostate-specific antigen; DRE = digital rectal examination; \* $p = 0.05$ , \*\* $p = 0.01$ , \*\*\* $p < 0.001$

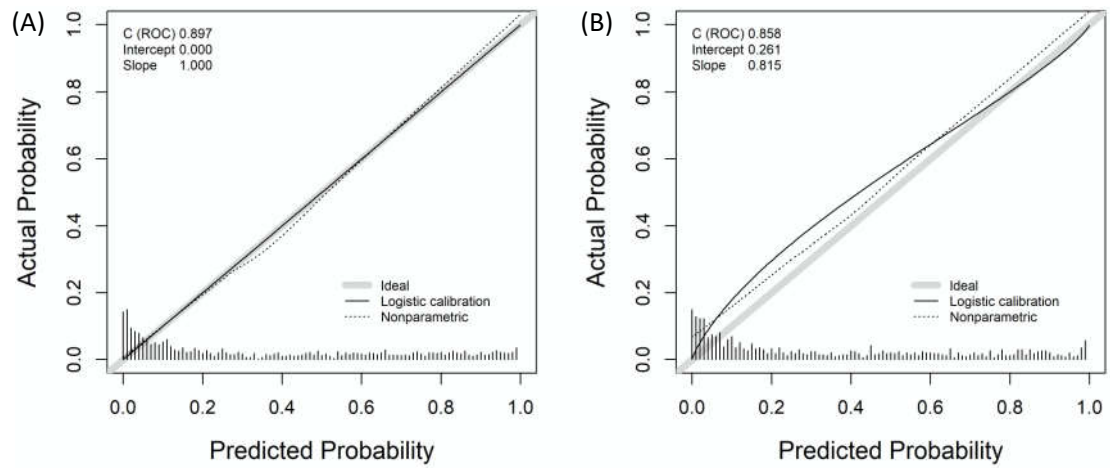

**Figure S2.** Calibration curve of MRI-PM in development cohort (A), and external validation cohort (B).

**Table S1.** Estimation, in a 1000 cases development (A) and external validation (B) cohorts of absolute missed csPCa and avoided biopsies for different thresholds and PI-RADS categories.

| Series Group<br>Cases | DEVELOPMENT COHORT (A) |                |                 |                |                 |                |                 |                |                 |                | VALIDATION COHORT (B) |                |                 |                |                 |                |                 |                |                 |                |
|-----------------------|------------------------|----------------|-----------------|----------------|-----------------|----------------|-----------------|----------------|-----------------|----------------|-----------------------|----------------|-----------------|----------------|-----------------|----------------|-----------------|----------------|-----------------|----------------|
|                       | PIRADS 1-2             |                | PIRADS 3        |                | PIRADS 4        |                | PIRADS 5        |                | Global cohort   |                | PIRADS 1-2            |                | PIRADS 3        |                | PIRADS 4        |                | PIRADS 5        |                | Global cohort   |                |
|                       | csPC                   | total          | csPC            | total          | csPC            | total          | csPC            | total          | csPC            | total          | csPC                  | total          | csPC            | total          | csPC            | total          | csPC            | total          | csPC            | total          |
|                       | 9                      | 212            | 46              | 299            | 159             | 303            | 155             | 186            | 369             | 1000           | 44                    | 248            | 43              | 212            | 215             | 413            | 106             | 126            | 408             | 999            |
| Cut-off point         | Missed csPC (n)        | Avoided Bx (n) | Missed csPC (n) | Avoided Bx (n) | Missed csPC (n) | Avoided Bx (n) | Missed csPC (n) | Avoided Bx (n) | Missed csPC (n) | Avoided Bx (n) | Missed csPC (n)       | Avoided Bx (n) | Missed csPC (n) | Avoided Bx (n) | Missed csPC (n) | Avoided Bx (n) | Missed csPC (n) | Avoided Bx (n) | Missed csPC (n) | Avoided Bx (n) |
| 0                     | 0                      | 0              | 0               | 0              | 0               | 0              | 0               | 0              | 0               | 0              | 0                     | 0              | 0               | 0              | 0               | 0              | 0               | 0              | 0               | 0              |
| 1                     | 1                      | 47             | 0               | 9              | 0               | 0              | 0               | 0              | 1               | 56             | 3                     | 45             | 0               | 6              | 0               | 0              | 1               | 1              | 4               | 52             |
| 2                     | 3                      | 99             | 0               | 15             | 0               | 1              | 0               | 0              | 3               | 115            | 4                     | 86             | 0               | 11             | 0               | 0              | 1               | 2              | 5               | 99             |
| 3                     | 3                      | 131            | 0               | 20             | 0               | 1              | 0               | 0              | 3               | 152            | 10                    | 119            | 1               | 18             | 0               | 2              | 1               | 2              | 12              | 141            |
| 4                     | 5                      | 151            | 1               | 33             | 0               | 1              | 0               | 0              | 6               | 185            | 14                    | 151            | 2               | 26             | 1               | 5              | 1               | 2              | 18              | 184            |
| 5                     | 5                      | 164            | 1               | 51             | 0               | 1              | 0               | 0              | 6               | 216            | 15                    | 162            | 3               | 37             | 1               | 7              | 1               | 2              | 20              | 208            |
| 6                     | 5                      | 174            | 1               | 64             | 0               | 3              | 0               | 0              | 6               | 241            | 18                    | 181            | 3               | 44             | 1               | 7              | 1               | 2              | 23              | 234            |
| 7                     | 5                      | 182            | 5               | 79             | 0               | 3              | 0               | 0              | 10              | 264            | 20                    | 191            | 4               | 57             | 1               | 8              | 1               | 2              | 26              | 258            |
| 8                     | 5                      | 187            | 7               | 92             | 0               | 3              | 0               | 0              | 12              | 282            | 23                    | 202            | 4               | 71             | 1               | 13             | 1               | 2              | 29              | 288            |
| 9                     | 5                      | 192            | 7               | 106            | 0               | 4              | 0               | 0              | 12              | 302            | 26                    | 207            | 4               | 78             | 1               | 14             | 1               | 2              | 32              | 301            |
| 10                    | 5                      | 194            | 9               | 118            | 1               | 7              | 0               | 0              | 15              | 319            | 30                    | 216            | 4               | 89             | 1               | 16             | 1               | 2              | 36              | 323            |
| 11                    | 5                      | 196            | 11              | 136            | 1               | 8              | 0               | 1              | 17              | 341            | 32                    | 224            | 5               | 101            | 1               | 18             | 1               | 3              | 39              | 346            |
| 12                    | 5                      | 199            | 11              | 153            | 1               | 11             | 0               | 1              | 17              | 364            | 33                    | 225            | 6               | 111            | 2               | 20             | 1               | 3              | 42              | 359            |
| 13                    | 6                      | 201            | 11              | 167            | 1               | 11             | 0               | 1              | 18              | 380            | 34                    | 226            | 6               | 123            | 2               | 25             | 1               | 3              | 43              | 377            |
| 14                    | 6                      | 202            | 13              | 177            | 1               | 11             | 0               | 1              | 20              | 391            | 35                    | 228            | 6               | 131            | 3               | 26             | 1               | 3              | 45              | 388            |
| 15                    | 6                      | 203            | 13              | 185            | 1               | 12             | 0               | 1              | 20              | 401            | 36                    | 232            | 6               | 134            | 4               | 30             | 1               | 3              | 47              | 399            |
| 16                    | 7                      | 205            | 15              | 196            | 1               | 13             | 1               | 1              | 24              | 415            | 36                    | 234            | 8               | 142            | 4               | 37             | 1               | 3              | 49              | 416            |
| 17                    | 7                      | 206            | 16              | 202            | 2               | 15             | 1               | 1              | 26              | 424            | 38                    | 236            | 10              | 146            | 4               | 42             | 1               | 3              | 53              | 427            |
| 18                    | 7                      | 206            | 16              | 208            | 3               | 17             | 1               | 2              | 27              | 433            | 39                    | 239            | 13              | 151            | 4               | 47             | 1               | 3              | 57              | 440            |
| 19                    | 7                      | 207            | 16              | 216            | 3               | 22             | 1               | 2              | 27              | 447            | 40                    | 240            | 14              | 155            | 4               | 52             | 1               | 3              | 59              | 450            |
| 20                    | 7                      | 207            | 20              | 223            | 3               | 25             | 1               | 2              | 31              | 457            | 40                    | 240            | 14              | 159            | 4               | 55             | 1               | 3              | 59              | 457            |
| 21                    | 7                      | 207            | 21              | 229            | 4               | 26             | 1               | 3              | 33              | 465            | 40                    | 240            | 16              | 164            | 5               | 61             | 1               | 3              | 62              | 468            |
| 22                    | 7                      | 208            | 24              | 236            | 4               | 29             | 1               | 3              | 36              | 476            | 40                    | 240            | 16              | 167            | 6               | 64             | 1               | 3              | 63              | 474            |
| 23                    | 7                      | 209            | 27              | 241            | 5               | 31             | 1               | 3              | 40              | 484            | 40                    | 241            | 18              | 173            | 7               | 70             | 1               | 3              | 66              | 487            |
| 24                    | 7                      | 209            | 27              | 242            | 5               | 34             | 1               | 3              | 40              | 488            | 40                    | 241            | 19              | 177            | 8               | 74             | 1               | 3              | 68              | 495            |
| 25                    | 7                      | 209            | 28              | 248            | 5               | 36             | 1               | 3              | 41              | 496            | 40                    | 242            | 19              | 177            | 8               | 77             | 1               | 3              | 68              | 499            |
| 26                    | 7                      | 209            | 31              | 258            | 5               | 39             | 1               | 3              | 44              | 509            | 41                    | 243            | 19              | 177            | 10              | 85             | 1               | 3              | 71              | 508            |
| 27                    | 7                      | 209            | 31              | 261            | 6               | 44             | 1               | 3              | 45              | 517            | 41                    | 244            | 19              | 180            | 10              | 87             | 1               | 3              | 71              | 514            |
| 28                    | 8                      | 210            | 31              | 263            | 6               | 46             | 1               | 3              | 46              | 522            | 41                    | 244            | 20              | 183            | 13              | 94             | 1               | 3              | 75              | 524            |
| 29                    | 8                      | 210            | 32              | 266            | 7               | 50             | 1               | 3              | 48              | 529            | 41                    | 244            | 21              | 185            | 15              | 98             | 1               | 3              | 78              | 530            |
| 30                    | 8                      | 210            | 33              | 268            | 9               | 57             | 1               | 3              | 51              | 538            | 41                    | 244            | 23              | 188            | 17              | 100            | 1               | 3              | 82              | 535            |
| 31                    | 8                      | 211            | 35              | 271            | 9               | 59             | 1               | 3              | 53              | 544            | 41                    | 244            | 29              | 193            | 17              | 104            | 1               | 3              | 88              | 544            |
| 32                    | 8                      | 211            | 36              | 272            | 9               | 61             | 1               | 3              | 54              | 547            | 42                    | 245            | 31              | 196            | 19              | 109            | 1               | 3              | 93              | 553            |
| 33                    | 8                      | 211            | 36              | 273            | 11              | 63             | 1               | 3              | 56              | 550            | 42                    | 245            | 31              | 199            | 19              | 111            | 1               | 3              | 93              | 558            |
| 34                    | 8                      | 211            | 37              | 277            | 12              | 65             | 1               | 3              | 58              | 556            | 42                    | 245            | 31              | 199            | 21              | 115            | 1               | 4              | 95              | 563            |
| 35                    | 8                      | 211            | 37              | 277            | 13              | 66             | 1               | 3              | 59              | 557            | 42                    | 245            | 32              | 200            | 21              | 118            | 1               | 4              | 96              | 567            |
| 36                    | 8                      | 211            | 38              | 279            | 13              | 67             | 1               | 3              | 60              | 560            | 42                    | 246            | 34              | 202            | 23              | 123            | 1               | 4              | 100             | 575            |
| 37                    | 8                      | 211            | 40              | 281            | 13              | 71             | 1               | 3              | 62              | 566            | 42                    | 246            | 34              | 202            | 24              | 126            | 1               | 4              | 101             | 578            |
| 38                    | 8                      | 211            | 41              | 283            | 16              | 74             | 1               | 3              | 66              | 571            | 42                    | 246            | 34              | 202            | 24              | 130            | 1               | 4              | 101             | 582            |
| 39                    | 8                      | 211            | 43              | 285            | 17              | 79             | 1               | 3              | 69              | 578            | 42                    | 246            | 34              | 202            | 25              | 135            | 1               | 4              | 102             | 587            |
| 40                    | 8                      | 211            | 43              | 285            | 19              | 86             | 1               | 3              | 71              | 585            | 42                    | 246            | 36              | 204            | 26              | 137            | 1               | 5              | 105             | 592            |
| 41                    | 8                      | 211            | 43              | 285            | 20              | 90             | 1               | 3              | 72              | 589            | 42                    | 246            | 38              | 206            | 30              | 145            | 1               | 5              | 111             | 602            |
| 42                    | 8                      | 211            | 43              | 285            | 22              | 93             | 1               | 4              | 74              | 593            | 42                    | 246            | 38              | 207            | 33              | 152            | 1               | 5              | 114             | 610            |
| 43                    | 8                      | 211            | 43              | 286            | 22              | 98             | 1               | 4              | 74              | 599            | 43                    | 247            | 38              | 207            | 34              | 158            | 1               | 5              | 116             | 617            |
| 44                    | 8                      | 211            | 43              | 287            | 22              | 101            | 1               | 4              | 74              | 603            | 43                    | 247            | 38              | 207            | 34              | 160            | 1               | 5              | 116             | 619            |
| 45                    | 8                      | 211            | 43              | 288            | 23              | 104            | 1               | 4              | 75              | 607            | 43                    | 247            | 38              | 207            | 36              | 164            | 1               | 5              | 118             | 623            |
| 46                    | 8                      | 211            | 43              | 289            | 26              | 109            | 1               | 4              | 78              | 613            | 43                    | 247            | 39              | 208            | 44              | 178            | 1               | 5              | 127             | 638            |
| 47                    | 8                      | 211            | 43              | 289            | 28              | 114            | 3               | 6              | 82              | 620            | 43                    | 247            | 39              | 208            | 45              | 182            | 1               | 6              | 128             | 643            |
| 48                    | 8                      | 211            | 43              | 289            | 32              | 123            | 3               | 6              | 86              | 629            | 43                    | 247            | 39              | 208            | 47              | 187            | 2               | 7              | 131             | 649            |
| 49                    | 8                      | 211            | 43              | 289            | 34              | 129            | 3               | 6              | 88              | 635            | 44                    | 248            | 39              | 208            | 50              | 196            | 2               | 7              | 135             | 659            |

|     |   |     |    |     |     |     |     |     |     |      |    |     |    |     |     |     |     |     |     |     |
|-----|---|-----|----|-----|-----|-----|-----|-----|-----|------|----|-----|----|-----|-----|-----|-----|-----|-----|-----|
| 50  | 8 | 211 | 43 | 289 | 36  | 137 | 4   | 7   | 91  | 644  | 44 | 248 | 39 | 208 | 52  | 202 | 2   | 7   | 137 | 665 |
| 51  | 8 | 211 | 43 | 289 | 39  | 142 | 4   | 7   | 94  | 649  | 44 | 248 | 39 | 208 | 59  | 209 | 2   | 7   | 144 | 672 |
| 52  | 8 | 211 | 43 | 290 | 43  | 147 | 5   | 7   | 99  | 655  | 44 | 248 | 39 | 208 | 63  | 216 | 2   | 7   | 148 | 679 |
| 53  | 8 | 211 | 44 | 291 | 44  | 150 | 5   | 7   | 101 | 659  | 44 | 248 | 39 | 208 | 69  | 223 | 2   | 8   | 154 | 687 |
| 54  | 8 | 211 | 44 | 291 | 44  | 151 | 5   | 7   | 101 | 660  | 44 | 248 | 39 | 208 | 71  | 226 | 3   | 10  | 157 | 692 |
| 55  | 8 | 211 | 44 | 293 | 48  | 159 | 5   | 7   | 105 | 670  | 44 | 248 | 39 | 208 | 72  | 232 | 4   | 12  | 159 | 700 |
| 56  | 8 | 211 | 44 | 293 | 49  | 164 | 5   | 8   | 106 | 676  | 44 | 248 | 39 | 208 | 74  | 237 | 4   | 12  | 161 | 705 |
| 57  | 8 | 211 | 44 | 293 | 53  | 170 | 5   | 9   | 110 | 683  | 44 | 248 | 39 | 208 | 77  | 243 | 5   | 13  | 165 | 712 |
| 58  | 8 | 211 | 44 | 294 | 55  | 175 | 5   | 9   | 112 | 689  | 44 | 248 | 39 | 208 | 79  | 247 | 5   | 13  | 167 | 716 |
| 59  | 8 | 211 | 44 | 294 | 59  | 180 | 5   | 12  | 116 | 697  | 44 | 248 | 39 | 208 | 84  | 255 | 6   | 14  | 173 | 725 |
| 60  | 8 | 211 | 44 | 295 | 63  | 186 | 5   | 12  | 120 | 704  | 44 | 248 | 39 | 208 | 87  | 262 | 6   | 14  | 176 | 732 |
| 61  | 8 | 211 | 45 | 296 | 66  | 190 | 7   | 15  | 126 | 712  | 44 | 248 | 40 | 209 | 89  | 266 | 7   | 16  | 180 | 739 |
| 62  | 8 | 211 | 45 | 296 | 70  | 194 | 7   | 15  | 130 | 716  | 44 | 248 | 41 | 210 | 92  | 272 | 7   | 16  | 184 | 746 |
| 63  | 8 | 211 | 45 | 296 | 73  | 199 | 9   | 20  | 135 | 726  | 44 | 248 | 41 | 210 | 93  | 275 | 10  | 19  | 188 | 752 |
| 64  | 8 | 211 | 46 | 297 | 77  | 204 | 9   | 21  | 140 | 733  | 44 | 248 | 41 | 210 | 97  | 280 | 10  | 19  | 192 | 757 |
| 65  | 8 | 211 | 46 | 297 | 79  | 209 | 10  | 22  | 143 | 739  | 44 | 248 | 41 | 210 | 99  | 282 | 11  | 21  | 195 | 761 |
| 66  | 8 | 211 | 46 | 297 | 83  | 215 | 10  | 24  | 147 | 747  | 44 | 248 | 41 | 210 | 107 | 294 | 11  | 21  | 203 | 773 |
| 67  | 8 | 211 | 46 | 297 | 91  | 224 | 11  | 26  | 156 | 758  | 44 | 248 | 41 | 210 | 107 | 295 | 12  | 22  | 204 | 775 |
| 68  | 8 | 211 | 46 | 297 | 94  | 229 | 11  | 26  | 159 | 763  | 44 | 248 | 41 | 210 | 113 | 301 | 13  | 23  | 211 | 782 |
| 69  | 8 | 211 | 46 | 297 | 97  | 232 | 12  | 28  | 163 | 768  | 44 | 248 | 41 | 210 | 115 | 303 | 14  | 25  | 214 | 786 |
| 70  | 8 | 211 | 46 | 297 | 100 | 236 | 14  | 30  | 168 | 774  | 44 | 248 | 41 | 210 | 116 | 307 | 14  | 25  | 215 | 790 |
| 71  | 8 | 211 | 46 | 297 | 104 | 240 | 14  | 31  | 172 | 779  | 44 | 248 | 41 | 210 | 121 | 312 | 14  | 25  | 220 | 795 |
| 72  | 8 | 211 | 46 | 297 | 106 | 244 | 15  | 32  | 175 | 784  | 44 | 248 | 41 | 210 | 126 | 317 | 15  | 27  | 226 | 802 |
| 73  | 8 | 211 | 46 | 298 | 108 | 248 | 15  | 32  | 177 | 789  | 44 | 248 | 41 | 210 | 129 | 320 | 16  | 29  | 230 | 807 |
| 74  | 8 | 211 | 46 | 298 | 114 | 253 | 18  | 35  | 186 | 797  | 44 | 248 | 41 | 210 | 134 | 326 | 17  | 30  | 236 | 814 |
| 75  | 8 | 211 | 46 | 298 | 120 | 260 | 20  | 38  | 194 | 807  | 44 | 248 | 41 | 210 | 136 | 329 | 17  | 30  | 238 | 817 |
| 76  | 8 | 211 | 46 | 298 | 122 | 264 | 23  | 40  | 199 | 813  | 44 | 248 | 41 | 210 | 140 | 334 | 20  | 34  | 245 | 826 |
| 77  | 8 | 211 | 46 | 298 | 124 | 266 | 24  | 42  | 202 | 817  | 44 | 248 | 41 | 210 | 142 | 336 | 20  | 34  | 247 | 828 |
| 78  | 8 | 211 | 46 | 298 | 128 | 271 | 28  | 46  | 210 | 826  | 44 | 248 | 41 | 210 | 144 | 338 | 23  | 37  | 252 | 833 |
| 79  | 8 | 211 | 46 | 298 | 132 | 275 | 30  | 49  | 216 | 833  | 44 | 248 | 42 | 211 | 150 | 346 | 25  | 39  | 261 | 844 |
| 80  | 8 | 211 | 46 | 298 | 135 | 279 | 34  | 53  | 223 | 841  | 44 | 248 | 42 | 211 | 153 | 349 | 26  | 40  | 265 | 848 |
| 81  | 8 | 211 | 46 | 298 | 138 | 282 | 40  | 59  | 232 | 850  | 44 | 248 | 42 | 211 | 155 | 351 | 27  | 42  | 268 | 852 |
| 82  | 8 | 211 | 46 | 298 | 140 | 284 | 43  | 62  | 237 | 855  | 44 | 248 | 42 | 211 | 161 | 356 | 27  | 42  | 274 | 857 |
| 83  | 8 | 211 | 46 | 298 | 141 | 285 | 50  | 69  | 245 | 863  | 44 | 248 | 42 | 211 | 166 | 362 | 32  | 48  | 284 | 869 |
| 84  | 8 | 211 | 46 | 298 | 143 | 287 | 55  | 77  | 252 | 873  | 44 | 248 | 42 | 211 | 174 | 370 | 33  | 50  | 293 | 879 |
| 85  | 8 | 211 | 46 | 298 | 145 | 289 | 61  | 83  | 260 | 881  | 44 | 248 | 42 | 211 | 177 | 372 | 36  | 53  | 299 | 884 |
| 86  | 8 | 211 | 46 | 298 | 146 | 290 | 66  | 89  | 266 | 888  | 44 | 248 | 42 | 211 | 178 | 373 | 44  | 62  | 308 | 894 |
| 87  | 8 | 211 | 46 | 298 | 147 | 291 | 74  | 98  | 275 | 898  | 44 | 248 | 42 | 211 | 180 | 376 | 48  | 66  | 314 | 901 |
| 88  | 8 | 211 | 46 | 298 | 148 | 292 | 77  | 102 | 279 | 903  | 44 | 248 | 42 | 211 | 182 | 378 | 54  | 72  | 322 | 909 |
| 89  | 8 | 211 | 46 | 298 | 148 | 292 | 81  | 106 | 283 | 907  | 44 | 248 | 42 | 211 | 184 | 382 | 59  | 78  | 329 | 919 |
| 90  | 8 | 211 | 46 | 298 | 149 | 293 | 84  | 111 | 287 | 913  | 44 | 248 | 42 | 211 | 188 | 386 | 63  | 84  | 337 | 929 |
| 91  | 9 | 212 | 46 | 298 | 150 | 294 | 90  | 118 | 295 | 922  | 44 | 248 | 42 | 211 | 191 | 389 | 68  | 88  | 345 | 936 |
| 92  | 9 | 212 | 46 | 298 | 150 | 294 | 96  | 123 | 301 | 927  | 44 | 248 | 42 | 211 | 192 | 390 | 70  | 90  | 348 | 939 |
| 93  | 9 | 212 | 46 | 298 | 150 | 294 | 102 | 129 | 307 | 933  | 44 | 248 | 42 | 211 | 192 | 390 | 75  | 95  | 353 | 944 |
| 94  | 9 | 212 | 46 | 298 | 151 | 295 | 109 | 137 | 315 | 942  | 44 | 248 | 42 | 211 | 195 | 392 | 77  | 97  | 358 | 948 |
| 95  | 9 | 212 | 46 | 298 | 152 | 296 | 117 | 147 | 324 | 953  | 44 | 248 | 42 | 211 | 196 | 393 | 79  | 99  | 361 | 951 |
| 96  | 9 | 212 | 46 | 298 | 153 | 297 | 124 | 155 | 332 | 962  | 44 | 248 | 42 | 211 | 198 | 395 | 85  | 105 | 369 | 959 |
| 97  | 9 | 212 | 46 | 298 | 153 | 297 | 132 | 162 | 340 | 969  | 44 | 248 | 42 | 211 | 199 | 396 | 87  | 107 | 372 | 962 |
| 98  | 9 | 212 | 46 | 299 | 154 | 298 | 138 | 168 | 347 | 977  | 44 | 248 | 42 | 211 | 202 | 400 | 88  | 108 | 376 | 967 |
| 99  | 9 | 212 | 46 | 299 | 156 | 300 | 144 | 175 | 355 | 986  | 44 | 248 | 42 | 211 | 208 | 406 | 94  | 114 | 388 | 979 |
| 100 | 9 | 212 | 46 | 299 | 159 | 303 | 155 | 186 | 369 | 1000 | 44 | 248 | 43 | 212 | 215 | 413 | 106 | 126 | 408 | 999 |

**Table S2.** Estimation, in a 1000 cases development (A) and external validation (B) cohorts of relative values of missed csPCa and avoided biopsies for different thresholds and PI-RAD categories.

| Series Group<br>Cases | DEVELOPMENT COHORT |                |                 |                |                 |                |                 |                |                 |                | VALIDATION COHORT |                |                 |                |                 |                |                 |                |                 |                |
|-----------------------|--------------------|----------------|-----------------|----------------|-----------------|----------------|-----------------|----------------|-----------------|----------------|-------------------|----------------|-----------------|----------------|-----------------|----------------|-----------------|----------------|-----------------|----------------|
|                       | PIRADS 1-2         |                | PIRADS 3        |                | PIRADS 4        |                | PIRADS 5        |                | Global cohort   |                | PIRADS 1-2        |                | PIRADS 3        |                | PIRADS 4        |                | PIRADS 5        |                | Global cohort   |                |
|                       | csPC               | total          | csPC            | total          | csPC            | total          | csPC            | total          | csPC            | total          | csPC              | total          | csPC            | total          | csPC            | total          | csPC            | total          | csPC            | total          |
|                       | 9                  | 212            | 46              | 299            | 159             | 303            | 155             | 186            | 369             | 1000           | 44                | 248            | 43              | 212            | 215             | 413            | 106             | 126            | 408             | 999            |
| Cut-off point         | Missed csPC (%)    | Avoided Bx (%) | Missed csPC (%) | Avoided Bx (%) | Missed csPC (%) | Avoided Bx (%) | Missed csPC (%) | Avoided Bx (%) | Missed csPC (%) | Avoided Bx (%) | Missed csPC (%)   | Avoided Bx (%) | Missed csPC (%) | Avoided Bx (%) | Missed csPC (%) | Avoided Bx (%) | Missed csPC (%) | Avoided Bx (%) | Missed csPC (%) | Avoided Bx (%) |
| 0                     | 0                  | 0              | 0               | 0              | 0               | 0              | 0               | 0              | 0               | 0              | 0                 | 0              | 0               | 0              | 0               | 0              | 0               | 0              | 0               | 0              |
| 1                     | 11                 | 22             | 0               | 3              | 0               | 0              | 0               | 0              | 0               | 6              | 7                 | 18             | 0               | 3              | 0               | 0              | 1               | 1              | 1               | 5              |
| 2                     | 33                 | 47             | 0               | 5              | 0               | 0              | 0               | 0              | 1               | 12             | 9                 | 35             | 0               | 5              | 0               | 0              | 1               | 2              | 1               | 10             |
| 3                     | 33                 | 62             | 0               | 7              | 0               | 0              | 0               | 0              | 1               | 15             | 23                | 48             | 2               | 8              | 0               | 0              | 1               | 2              | 3               | 14             |
| 4                     | 56                 | 71             | 2               | 11             | 0               | 0              | 0               | 0              | 2               | 19             | 32                | 61             | 5               | 12             | 0               | 1              | 1               | 2              | 4               | 18             |
| 5                     | 56                 | 77             | 2               | 17             | 0               | 0              | 0               | 0              | 2               | 22             | 34                | 65             | 7               | 17             | 0               | 2              | 1               | 2              | 5               | 21             |
| 6                     | 56                 | 82             | 2               | 21             | 0               | 1              | 0               | 0              | 2               | 24             | 41                | 73             | 7               | 21             | 0               | 2              | 1               | 2              | 6               | 23             |
| 7                     | 56                 | 86             | 11              | 26             | 0               | 1              | 0               | 0              | 3               | 26             | 45                | 77             | 9               | 27             | 0               | 2              | 1               | 2              | 6               | 26             |
| 8                     | 56                 | 88             | 15              | 31             | 0               | 1              | 0               | 0              | 3               | 28             | 52                | 81             | 9               | 33             | 0               | 3              | 1               | 2              | 7               | 29             |
| 9                     | 56                 | 91             | 15              | 35             | 0               | 1              | 0               | 0              | 3               | 30             | 59                | 83             | 9               | 37             | 0               | 3              | 1               | 2              | 8               | 30             |
| 10                    | 56                 | 92             | 20              | 39             | 1               | 2              | 0               | 0              | 4               | 32             | 68                | 87             | 9               | 42             | 0               | 4              | 1               | 2              | 9               | 32             |
| 11                    | 56                 | 92             | 24              | 45             | 1               | 3              | 0               | 1              | 5               | 34             | 73                | 90             | 12              | 48             | 0               | 4              | 1               | 2              | 10              | 35             |
| 12                    | 56                 | 94             | 24              | 51             | 1               | 4              | 0               | 1              | 5               | 36             | 75                | 91             | 14              | 52             | 1               | 5              | 1               | 2              | 10              | 36             |
| 13                    | 67                 | 95             | 24              | 56             | 1               | 4              | 0               | 1              | 5               | 38             | 77                | 91             | 14              | 58             | 1               | 6              | 1               | 2              | 11              | 38             |
| 14                    | 67                 | 95             | 28              | 59             | 1               | 4              | 0               | 1              | 5               | 39             | 80                | 92             | 14              | 62             | 1               | 6              | 1               | 2              | 11              | 39             |
| 15                    | 67                 | 96             | 28              | 62             | 1               | 4              | 0               | 1              | 5               | 40             | 82                | 94             | 14              | 63             | 2               | 7              | 1               | 2              | 12              | 40             |
| 16                    | 78                 | 97             | 33              | 66             | 1               | 4              | 1               | 1              | 7               | 42             | 82                | 94             | 19              | 67             | 2               | 9              | 1               | 2              | 12              | 42             |
| 17                    | 78                 | 97             | 35              | 68             | 1               | 5              | 1               | 1              | 7               | 42             | 86                | 95             | 23              | 69             | 2               | 10             | 1               | 2              | 13              | 43             |
| 18                    | 78                 | 97             | 35              | 70             | 2               | 6              | 1               | 1              | 7               | 43             | 89                | 96             | 30              | 71             | 2               | 11             | 1               | 2              | 14              | 44             |
| 19                    | 78                 | 98             | 35              | 72             | 2               | 7              | 1               | 1              | 7               | 45             | 91                | 97             | 33              | 73             | 2               | 13             | 1               | 2              | 14              | 45             |
| 20                    | 78                 | 98             | 43              | 75             | 2               | 8              | 1               | 1              | 8               | 46             | 91                | 97             | 33              | 75             | 2               | 13             | 1               | 2              | 14              | 46             |
| 21                    | 78                 | 98             | 46              | 77             | 3               | 9              | 1               | 2              | 9               | 47             | 91                | 97             | 37              | 77             | 2               | 15             | 1               | 2              | 15              | 47             |
| 22                    | 78                 | 98             | 52              | 79             | 3               | 10             | 1               | 2              | 10              | 48             | 91                | 97             | 37              | 79             | 3               | 15             | 1               | 2              | 15              | 47             |
| 23                    | 78                 | 99             | 59              | 81             | 3               | 10             | 1               | 2              | 11              | 48             | 91                | 97             | 42              | 82             | 3               | 17             | 1               | 2              | 16              | 49             |
| 24                    | 78                 | 99             | 59              | 81             | 3               | 11             | 1               | 2              | 11              | 49             | 91                | 97             | 44              | 83             | 4               | 18             | 1               | 2              | 17              | 50             |
| 25                    | 78                 | 99             | 61              | 83             | 3               | 12             | 1               | 2              | 11              | 50             | 91                | 98             | 44              | 83             | 4               | 19             | 1               | 2              | 17              | 50             |
| 26                    | 78                 | 99             | 67              | 86             | 3               | 13             | 1               | 2              | 12              | 51             | 93                | 98             | 44              | 83             | 5               | 21             | 1               | 2              | 17              | 51             |
| 27                    | 78                 | 99             | 67              | 87             | 4               | 15             | 1               | 2              | 12              | 52             | 93                | 98             | 44              | 85             | 5               | 21             | 1               | 2              | 17              | 51             |
| 28                    | 89                 | 99             | 67              | 88             | 4               | 15             | 1               | 2              | 12              | 52             | 93                | 98             | 47              | 86             | 6               | 23             | 1               | 2              | 18              | 52             |
| 29                    | 89                 | 99             | 70              | 89             | 4               | 17             | 1               | 2              | 13              | 53             | 93                | 98             | 49              | 87             | 7               | 24             | 1               | 2              | 19              | 53             |
| 30                    | 89                 | 99             | 72              | 90             | 6               | 19             | 1               | 2              | 14              | 54             | 93                | 98             | 53              | 89             | 8               | 24             | 1               | 2              | 20              | 54             |
| 31                    | 89                 | 100            | 76              | 91             | 6               | 19             | 1               | 2              | 14              | 54             | 93                | 98             | 67              | 91             | 8               | 25             | 1               | 2              | 22              | 54             |
| 32                    | 89                 | 100            | 78              | 91             | 6               | 20             | 1               | 2              | 15              | 55             | 95                | 99             | 72              | 92             | 9               | 26             | 1               | 2              | 23              | 55             |
| 33                    | 89                 | 100            | 78              | 91             | 7               | 21             | 1               | 2              | 15              | 55             | 95                | 99             | 72              | 94             | 9               | 27             | 1               | 2              | 23              | 56             |
| 34                    | 89                 | 100            | 80              | 93             | 8               | 21             | 1               | 2              | 16              | 56             | 95                | 99             | 72              | 94             | 10              | 28             | 1               | 3              | 23              | 56             |
| 35                    | 89                 | 100            | 80              | 93             | 8               | 22             | 1               | 2              | 16              | 56             | 95                | 99             | 74              | 94             | 10              | 29             | 1               | 3              | 24              | 57             |
| 36                    | 89                 | 100            | 83              | 93             | 8               | 22             | 1               | 2              | 16              | 56             | 95                | 99             | 79              | 95             | 11              | 30             | 1               | 3              | 25              | 58             |
| 37                    | 89                 | 100            | 87              | 94             | 8               | 23             | 1               | 2              | 17              | 57             | 95                | 99             | 79              | 95             | 11              | 31             | 1               | 3              | 25              | 58             |
| 38                    | 89                 | 100            | 89              | 95             | 10              | 24             | 1               | 2              | 18              | 57             | 95                | 99             | 79              | 95             | 11              | 31             | 1               | 3              | 25              | 58             |
| 39                    | 89                 | 100            | 93              | 95             | 11              | 26             | 1               | 2              | 19              | 58             | 95                | 99             | 79              | 95             | 12              | 33             | 1               | 3              | 25              | 59             |
| 40                    | 89                 | 100            | 93              | 95             | 12              | 28             | 1               | 2              | 19              | 59             | 95                | 99             | 84              | 96             | 12              | 33             | 1               | 4              | 26              | 59             |
| 41                    | 89                 | 100            | 93              | 95             | 13              | 30             | 1               | 2              | 20              | 59             | 95                | 99             | 88              | 97             | 14              | 35             | 1               | 4              | 27              | 60             |
| 42                    | 89                 | 100            | 93              | 95             | 14              | 31             | 1               | 2              | 20              | 59             | 95                | 99             | 88              | 98             | 15              | 37             | 1               | 4              | 28              | 61             |
| 43                    | 89                 | 100            | 93              | 96             | 14              | 32             | 1               | 2              | 20              | 60             | 98                | 100            | 88              | 98             | 16              | 38             | 1               | 4              | 28              | 62             |
| 44                    | 89                 | 100            | 93              | 96             | 14              | 33             | 1               | 2              | 20              | 60             | 98                | 100            | 88              | 98             | 16              | 39             | 1               | 4              | 28              | 62             |
| 45                    | 89                 | 100            | 93              | 96             | 14              | 34             | 1               | 2              | 20              | 61             | 98                | 100            | 88              | 98             | 17              | 40             | 1               | 4              | 29              | 62             |
| 46                    | 89                 | 100            | 93              | 97             | 16              | 36             | 1               | 2              | 21              | 61             | 98                | 100            | 91              | 98             | 20              | 43             | 1               | 4              | 31              | 64             |
| 47                    | 89                 | 100            | 93              | 97             | 18              | 38             | 2               | 3              | 22              | 62             | 98                | 100            | 91              | 98             | 21              | 44             | 1               | 5              | 31              | 64             |
| 48                    | 89                 | 100            | 93              | 97             | 20              | 41             | 2               | 3              | 23              | 63             | 98                | 100            | 91              | 98             | 22              | 45             | 2               | 6              | 32              | 65             |
| 49                    | 89                 | 100            | 93              | 97             | 21              | 43             | 2               | 3              | 24              | 64             | 100               | 100            | 91              | 98             | 23              | 47             | 2               | 6              | 33              | 66             |

|     |     |     |     |     |     |     |     |     |     |     |     |     |     |     |     |     |     |     |     |     |
|-----|-----|-----|-----|-----|-----|-----|-----|-----|-----|-----|-----|-----|-----|-----|-----|-----|-----|-----|-----|-----|
| 50  | 89  | 100 | 93  | 97  | 23  | 45  | 3   | 4   | 25  | 64  | 100 | 100 | 91  | 98  | 24  | 49  | 2   | 6   | 34  | 67  |
| 51  | 89  | 100 | 93  | 97  | 25  | 47  | 3   | 4   | 25  | 65  | 100 | 100 | 91  | 98  | 27  | 51  | 2   | 6   | 35  | 67  |
| 52  | 89  | 100 | 93  | 97  | 27  | 49  | 3   | 4   | 27  | 66  | 100 | 100 | 91  | 98  | 29  | 52  | 2   | 6   | 36  | 68  |
| 53  | 89  | 100 | 96  | 97  | 28  | 50  | 3   | 4   | 27  | 66  | 100 | 100 | 91  | 98  | 32  | 54  | 2   | 6   | 38  | 69  |
| 54  | 89  | 100 | 96  | 97  | 28  | 50  | 3   | 4   | 27  | 66  | 100 | 100 | 91  | 98  | 33  | 55  | 3   | 8   | 38  | 69  |
| 55  | 89  | 100 | 96  | 98  | 30  | 52  | 3   | 4   | 28  | 67  | 100 | 100 | 91  | 98  | 33  | 56  | 4   | 10  | 39  | 70  |
| 56  | 89  | 100 | 96  | 98  | 31  | 54  | 3   | 4   | 29  | 68  | 100 | 100 | 91  | 98  | 34  | 57  | 4   | 10  | 39  | 71  |
| 57  | 89  | 100 | 96  | 98  | 33  | 56  | 3   | 5   | 30  | 68  | 100 | 100 | 91  | 98  | 36  | 59  | 5   | 10  | 40  | 71  |
| 58  | 89  | 100 | 96  | 98  | 35  | 58  | 3   | 5   | 30  | 69  | 100 | 100 | 91  | 98  | 37  | 60  | 5   | 10  | 41  | 72  |
| 59  | 89  | 100 | 96  | 98  | 37  | 59  | 3   | 6   | 31  | 70  | 100 | 100 | 91  | 98  | 39  | 62  | 6   | 11  | 42  | 73  |
| 60  | 89  | 100 | 96  | 99  | 40  | 61  | 3   | 6   | 33  | 70  | 100 | 100 | 91  | 98  | 40  | 63  | 6   | 11  | 43  | 73  |
| 61  | 89  | 100 | 98  | 99  | 42  | 63  | 5   | 8   | 34  | 71  | 100 | 100 | 93  | 99  | 41  | 64  | 7   | 13  | 44  | 74  |
| 62  | 89  | 100 | 98  | 99  | 44  | 64  | 5   | 8   | 35  | 72  | 100 | 100 | 95  | 99  | 43  | 66  | 7   | 13  | 45  | 75  |
| 63  | 89  | 100 | 98  | 99  | 46  | 66  | 6   | 11  | 37  | 73  | 100 | 100 | 95  | 99  | 43  | 67  | 9   | 15  | 46  | 75  |
| 64  | 89  | 100 | 100 | 99  | 48  | 67  | 6   | 11  | 38  | 73  | 100 | 100 | 95  | 99  | 45  | 68  | 9   | 15  | 47  | 76  |
| 65  | 89  | 100 | 100 | 99  | 50  | 69  | 6   | 12  | 39  | 74  | 100 | 100 | 95  | 99  | 46  | 68  | 10  | 17  | 48  | 76  |
| 66  | 89  | 100 | 100 | 99  | 52  | 71  | 6   | 13  | 40  | 75  | 100 | 100 | 95  | 99  | 50  | 71  | 10  | 17  | 50  | 77  |
| 67  | 89  | 100 | 100 | 99  | 57  | 74  | 7   | 14  | 42  | 76  | 100 | 100 | 95  | 99  | 50  | 71  | 11  | 17  | 50  | 78  |
| 68  | 89  | 100 | 100 | 99  | 59  | 76  | 7   | 14  | 43  | 76  | 100 | 100 | 95  | 99  | 53  | 73  | 12  | 18  | 52  | 78  |
| 69  | 89  | 100 | 100 | 99  | 61  | 77  | 8   | 15  | 44  | 77  | 100 | 100 | 95  | 99  | 53  | 73  | 13  | 20  | 52  | 79  |
| 70  | 89  | 100 | 100 | 99  | 63  | 78  | 9   | 16  | 46  | 77  | 100 | 100 | 95  | 99  | 54  | 74  | 13  | 20  | 53  | 79  |
| 71  | 89  | 100 | 100 | 99  | 65  | 79  | 9   | 17  | 47  | 78  | 100 | 100 | 95  | 99  | 56  | 76  | 13  | 20  | 54  | 80  |
| 72  | 89  | 100 | 100 | 99  | 67  | 81  | 10  | 17  | 47  | 78  | 100 | 100 | 95  | 99  | 59  | 77  | 14  | 21  | 55  | 80  |
| 73  | 89  | 100 | 100 | 100 | 68  | 82  | 10  | 17  | 48  | 79  | 100 | 100 | 95  | 99  | 60  | 77  | 15  | 23  | 56  | 81  |
| 74  | 89  | 100 | 100 | 100 | 72  | 83  | 12  | 19  | 50  | 80  | 100 | 100 | 95  | 99  | 62  | 79  | 16  | 24  | 58  | 81  |
| 75  | 89  | 100 | 100 | 100 | 75  | 86  | 13  | 20  | 53  | 81  | 100 | 100 | 95  | 99  | 63  | 80  | 16  | 24  | 58  | 82  |
| 76  | 89  | 100 | 100 | 100 | 77  | 87  | 15  | 22  | 54  | 81  | 100 | 100 | 95  | 99  | 65  | 81  | 19  | 27  | 60  | 83  |
| 77  | 89  | 100 | 100 | 100 | 78  | 88  | 15  | 23  | 55  | 82  | 100 | 100 | 95  | 99  | 66  | 81  | 19  | 27  | 61  | 83  |
| 78  | 89  | 100 | 100 | 100 | 81  | 89  | 18  | 25  | 57  | 83  | 100 | 100 | 95  | 99  | 67  | 82  | 22  | 29  | 62  | 83  |
| 79  | 89  | 100 | 100 | 100 | 83  | 91  | 19  | 26  | 59  | 83  | 100 | 100 | 98  | 100 | 70  | 84  | 24  | 31  | 64  | 84  |
| 80  | 89  | 100 | 100 | 100 | 85  | 92  | 22  | 28  | 60  | 84  | 100 | 100 | 98  | 100 | 71  | 85  | 25  | 32  | 65  | 85  |
| 81  | 89  | 100 | 100 | 100 | 87  | 93  | 26  | 32  | 63  | 85  | 100 | 100 | 98  | 100 | 72  | 85  | 25  | 33  | 66  | 85  |
| 82  | 89  | 100 | 100 | 100 | 88  | 94  | 28  | 33  | 64  | 86  | 100 | 100 | 98  | 100 | 75  | 86  | 25  | 33  | 67  | 86  |
| 83  | 89  | 100 | 100 | 100 | 89  | 94  | 32  | 37  | 66  | 86  | 100 | 100 | 98  | 100 | 77  | 88  | 30  | 38  | 70  | 87  |
| 84  | 89  | 100 | 100 | 100 | 90  | 95  | 35  | 41  | 68  | 87  | 100 | 100 | 98  | 100 | 81  | 90  | 31  | 40  | 72  | 88  |
| 85  | 89  | 100 | 100 | 100 | 91  | 95  | 39  | 45  | 70  | 88  | 100 | 100 | 98  | 100 | 82  | 90  | 34  | 42  | 73  | 88  |
| 86  | 89  | 100 | 100 | 100 | 92  | 96  | 43  | 48  | 72  | 89  | 100 | 100 | 98  | 100 | 83  | 90  | 42  | 49  | 75  | 89  |
| 87  | 89  | 100 | 100 | 100 | 92  | 96  | 48  | 53  | 75  | 90  | 100 | 100 | 98  | 100 | 84  | 91  | 45  | 52  | 77  | 90  |
| 88  | 89  | 100 | 100 | 100 | 93  | 96  | 50  | 55  | 76  | 90  | 100 | 100 | 98  | 100 | 85  | 92  | 51  | 57  | 79  | 91  |
| 89  | 89  | 100 | 100 | 100 | 93  | 96  | 52  | 57  | 77  | 91  | 100 | 100 | 98  | 100 | 86  | 92  | 56  | 62  | 81  | 92  |
| 90  | 89  | 100 | 100 | 100 | 94  | 97  | 54  | 60  | 78  | 91  | 100 | 100 | 98  | 100 | 87  | 93  | 59  | 67  | 83  | 93  |
| 91  | 100 | 100 | 100 | 100 | 94  | 97  | 58  | 63  | 80  | 92  | 100 | 100 | 98  | 100 | 89  | 94  | 64  | 70  | 85  | 94  |
| 92  | 100 | 100 | 100 | 100 | 94  | 97  | 62  | 66  | 82  | 93  | 100 | 100 | 98  | 100 | 89  | 94  | 66  | 71  | 85  | 94  |
| 93  | 100 | 100 | 100 | 100 | 94  | 97  | 66  | 69  | 83  | 93  | 100 | 100 | 98  | 100 | 89  | 94  | 71  | 75  | 87  | 94  |
| 94  | 100 | 100 | 100 | 100 | 95  | 97  | 70  | 74  | 85  | 94  | 100 | 100 | 98  | 100 | 91  | 95  | 73  | 77  | 88  | 95  |
| 95  | 100 | 100 | 100 | 100 | 96  | 98  | 75  | 79  | 88  | 95  | 100 | 100 | 98  | 100 | 91  | 95  | 75  | 79  | 88  | 95  |
| 96  | 100 | 100 | 100 | 100 | 96  | 98  | 80  | 83  | 90  | 96  | 100 | 100 | 98  | 100 | 92  | 96  | 80  | 83  | 90  | 96  |
| 97  | 100 | 100 | 100 | 100 | 96  | 98  | 85  | 87  | 92  | 97  | 100 | 100 | 98  | 100 | 93  | 96  | 82  | 85  | 91  | 96  |
| 98  | 100 | 100 | 100 | 100 | 97  | 98  | 89  | 90  | 94  | 98  | 100 | 100 | 98  | 100 | 94  | 97  | 83  | 86  | 92  | 97  |
| 99  | 100 | 100 | 100 | 100 | 98  | 99  | 93  | 94  | 96  | 99  | 100 | 100 | 98  | 100 | 97  | 98  | 89  | 90  | 95  | 98  |
| 100 | 100 | 100 | 100 | 100 | 100 | 100 | 100 | 100 | 100 | 100 | 100 | 100 | 100 | 100 | 100 | 100 | 100 | 100 | 100 | 100 |

(A)

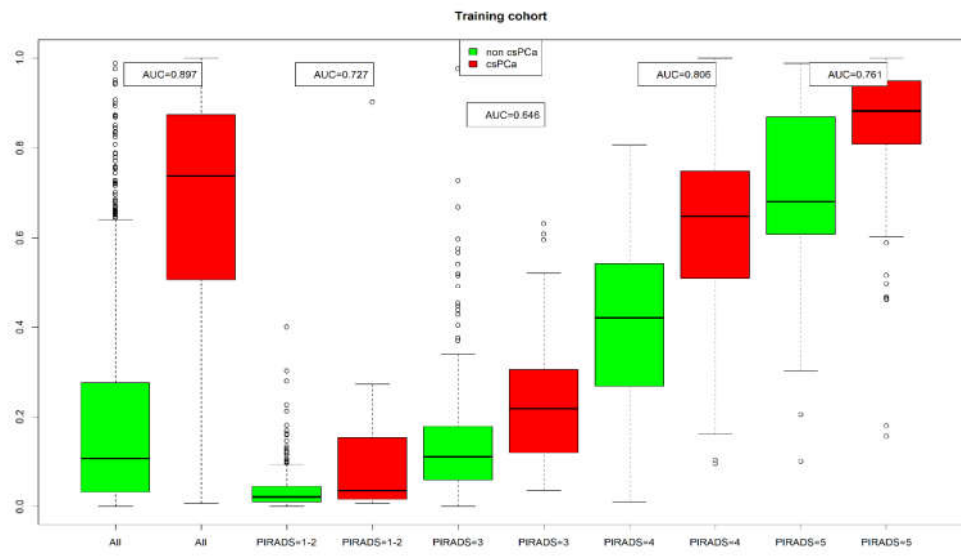

(B)

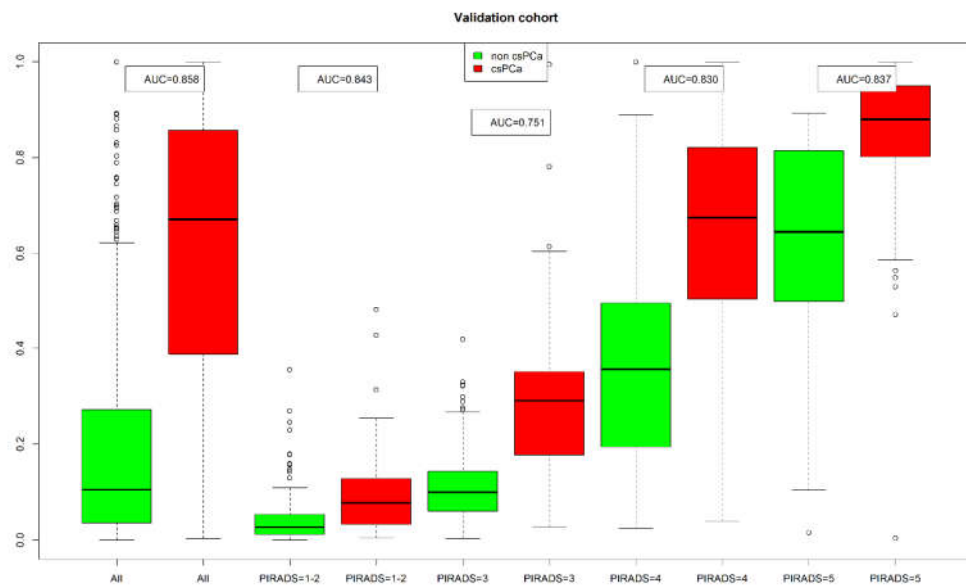

**Figure S3.** Boxplots of the likelihoods of csPCa in overall men and regarding PIRADS categories in development cohort (A) and external validation cohort (B).

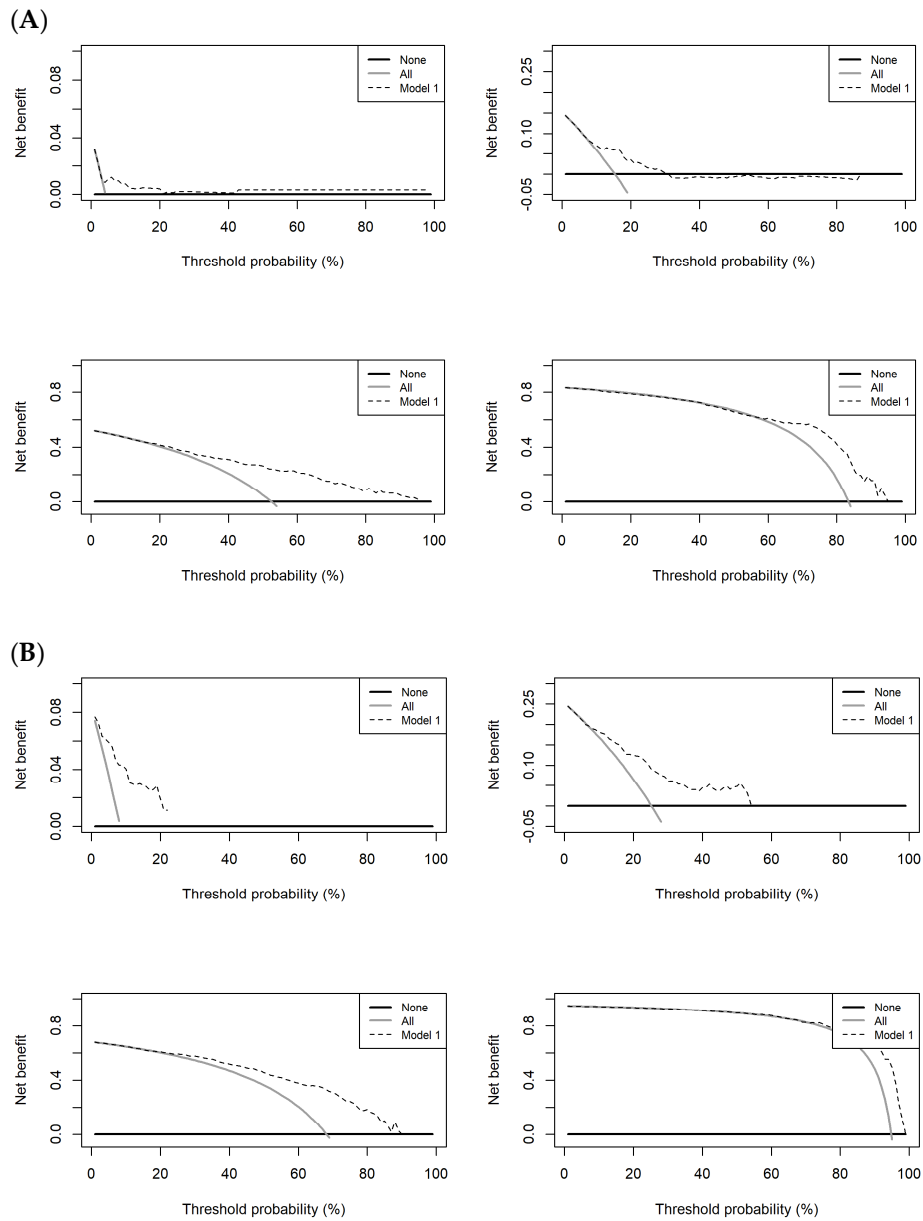

**Figure S4.** DCA showing the net benefit of MRI-PM biopsying all men according to the PI-RADS categories <3 (upper left), 3 (upper right), 4 (lower left), and 5 (lower right) in development cohort (A) and external validation cohort (B).
